# Supplementary material for: Synthesis, structure and magnetic property of a new organo-templated mixed-valent iron(ii, iii) borophosphate
Source: Royal Society of Chemistry journal article supplement (doi:10.1039/b820130g), 2009-01-01
Supplement: b820130g.pdf [file b820130g.pdf]

## Supporting Information

### Synthesis, structure and magnetic property of a new organo-templated mixed-valent iron (II, III) borophosphate

Weiting Yang, Jiyang Li, Qinhe Pan, Hongzhu Xing, Yan Chen, Jihong Yu,\* and Ruren Xu

State Key Laboratory of Inorganic Synthesis and Preparative Chemistry, College of Chemistry,

Jinlin University, Changchun 130012, P. R. China

E-mail: jihong@jlu.edu.cn

**Table S1 Selected Bond Lengths [ $\text{\AA}$ ] and Angles [deg] for FeBPO-CJ28<sup>a</sup>**

|              |          |                    |            |
|--------------|----------|--------------------|------------|
| Fe(1)-O(24)  | 2.075(3) | O(22)-P(2)-O(18)   | 106.39(15) |
| Fe(1)-O(8)   | 2.117(3) | O(24)-P(3)-O(27)   | 115.07(16) |
| Fe(1)-O(6)   | 2.123(3) | O(24)-P(3)-O(29)   | 111.74(15) |
| Fe(1)-O(25)  | 2.124(3) | O(27)-P(3)-O(29)   | 106.98(15) |
| Fe(1)-O(26)  | 2.130(3) | O(24)-P(3)-O(12)   | 110.65(16) |
| Fe(1)-O(28)  | 2.225(2) | O(27)-P(3)-O(12)   | 107.68(15) |
| Fe(2)-O(27)  | 1.958(3) | O(29)-P(3)-O(12)   | 104.05(15) |
| Fe(2)-O(17)  | 1.961(3) | O(26)-P(4)-O(17)#2 | 113.82(16) |
| Fe(2)-O(15)  | 1.985(3) | O(26)-P(4)-O(21)   | 111.57(16) |
| Fe(2)-O(20)  | 1.996(3) | O(17)#2-P(4)-O(21) | 105.60(15) |
| Fe(2)-O(23)  | 2.017(3) | O(26)-P(4)-O(7)    | 110.13(17) |
| Fe(2)-O(19)  | 2.149(2) | O(17)#2-P(4)-O(7)  | 107.35(16) |
| P(1)-O(6)    | 1.491(3) | O(21)-P(4)-O(7)    | 108.09(17) |
| P(1)-O(30)   | 1.541(3) | O(8)#3-P(5)-O(15)  | 112.41(16) |
| P(1)-O(14)   | 1.549(3) | O(8)#3-P(5)-O(10)  | 108.69(16) |
| P(1)-O(11)   | 1.553(3) | O(15)-P(5)-O(10)   | 109.58(15) |
| P(2)-O(25)   | 1.506(3) | O(8)#3-P(5)-O(3)   | 109.95(16) |
| P(2)-O(20)#1 | 1.510(3) | O(15)-P(5)-O(3)    | 110.32(18) |
| P(2)-O(22)   | 1.563(3) | O(10)-P(5)-O(3)    | 105.66(18) |
| P(2)-O(18)   | 1.564(3) | O(4)-P(6)-O(5)     | 111.45(18) |
| P(3)-O(24)   | 1.497(3) | O(4)-P(6)-O(13)    | 112.81(17) |
| P(3)-O(27)   | 1.517(3) | O(5)-P(6)-O(13)    | 106.60(15) |
| P(3)-O(29)   | 1.563(3) | O(4)-P(6)-O(16)    | 113.13(17) |
| P(3)-O(12)   | 1.563(3) | O(5)-P(6)-O(16)    | 108.03(17) |
| P(4)-O(26)   | 1.497(3) | O(13)-P(6)-O(16)   | 104.34(14) |
| P(4)-O(17)#2 | 1.508(3) | O(2)-P(7)-O(23)    | 115.25(18) |
| P(4)-O(21)   | 1.558(3) | O(2)-P(7)-O(9)     | 110.99(18) |
| P(4)-O(7)    | 1.566(3) | O(23)-P(7)-O(9)    | 110.79(15) |
| P(5)-O(8)#3  | 1.499(3) | O(2)-P(7)-O(1)     | 109.9(2)   |
| P(5)-O(15)   | 1.513(3) | O(23)-P(7)-O(1)    | 104.69(17) |
| P(5)-O(10)   | 1.562(3) | O(9)-P(7)-O(1)     | 104.44(17) |
| P(5)-O(3)    | 1.566(3) | O(28)-B(1)-O(16)   | 113.4(3)   |
| P(6)-O(4)    | 1.493(3) | O(28)-B(1)-O(29)   | 112.8(3)   |
| P(6)-O(5)    | 1.531(3) | O(16)-B(1)-O(29)   | 106.3(3)   |
| P(6)-O(13)   | 1.558(3) | O(28)-B(1)-O(21)   | 109.8(3)   |
| P(6)-O(16)   | 1.559(3) | O(16)-B(1)-O(21)   | 105.3(3)   |
| P(7)-O(2)    | 1.493(3) | O(29)-B(1)-O(21)   | 108.9(3)   |
| P(7)-O(23)   | 1.516(3) | O(28)-B(2)-O(22)   | 113.0(3)   |
| P(7)-O(9)    | 1.560(3) | O(28)-B(2)-O(13)   | 112.9(3)   |
| P(7)-O(1)    | 1.578(3) | O(22)-B(2)-O(13)   | 107.2(3)   |
| B(1)-O(28)   | 1.449(5) | O(28)-B(2)-O(30)   | 111.9(3)   |

---

|              |           |                      |            |
|--------------|-----------|----------------------|------------|
| B(1)-O(16)   | 1.474(5)  | O(22)-B(2)-O(30)     | 106.4(3)   |
| B(1)-O(29)   | 1.476(5)  | O(13)-B(2)-O(30)     | 105.0(3)   |
| B(1)-O(21)   | 1.493(5)  | O(19)-B(3)-O(12)     | 112.4(3)   |
| B(2)-O(28)   | 1.430(5)  | O(19)-B(3)-O(10)     | 110.4(3)   |
| B(2)-O(22)   | 1.472(5)  | O(12)-B(3)-O(10)     | 110.3(3)   |
| B(2)-O(13)   | 1.478(5)  | O(19)-B(3)-O(14)#4   | 113.2(3)   |
| B(2)-O(30)   | 1.505(5)  | O(12)-B(3)-O(14)#4   | 102.4(3)   |
| B(3)-O(19)   | 1.461(4)  | O(10)-B(3)-O(14)#4   | 107.7(3)   |
| B(3)-O(12)   | 1.468(5)  | O(19)-B(4)-O(9)      | 110.4(3)   |
| B(3)-O(10)   | 1.471(5)  | O(19)-B(4)-O(11)#4   | 113.8(3)   |
| B(3)-O(14)#4 | 1.481(5)  | O(9)-B(4)-O(11)#4    | 107.6(3)   |
| B(4)-O(19)   | 1.461(4)  | O(19)-B(4)-O(18)#5   | 112.3(3)   |
| B(4)-O(9)    | 1.472(5)  | O(9)-B(4)-O(18)#5    | 110.9(3)   |
| B(4)-O(11)#4 | 1.475(4)  | O(11)#4-B(4)-O(18)#5 | 101.5(3)   |
| B(4)-O(18)#5 | 1.480(5)  | P(7)-O(1)-H(1)       | 109.5      |
| O(1)-H(1)    | 0.82      | P(5)-O(3)-H(3)       | 109.5      |
| O(3)-H(3)    | 0.82      | P(6)-O(5)-H(5)       | 109.5      |
| O(5)-H(5)    | 0.82      | P(1)-O(6)-Fe(1)      | 127.63(16) |
| O(7)-H(7)    | 0.82      | P(4)-O(7)-H(7)       | 109.5      |
| O(8)-P(5)#3  | 1.499(3)  | P(5)#3-O(8)-Fe(1)    | 136.89(17) |
| O(11)-B(4)#6 | 1.475(4)  | B(4)-O(9)-P(7)       | 128.5(2)   |
| O(14)-B(3)#6 | 1.481(5)  | B(3)-O(10)-P(5)      | 127.3(2)   |
| O(17)-P(4)#7 | 1.508(3)  | B(4)#6-O(11)-P(1)    | 128.7(2)   |
| O(18)-B(4)#1 | 1.480(5)  | B(3)-O(12)-P(3)      | 132.1(2)   |
| O(20)-P(2)#5 | 1.510(3)  | B(2)-O(13)-P(6)      | 122.6(2)   |
| C(1)-C(2)    | 1.463(7)  | B(3)#6-O(14)-P(1)    | 126.7(2)   |
| C(1)-N(1)    | 1.472(8)  | P(5)-O(15)-Fe(2)     | 135.44(17) |
| C(1)-H(1A)   | 0.97      | B(1)-O(16)-P(6)      | 121.4(2)   |
| C(1)-H(1B)   | 0.97      | P(4)#7-O(17)-Fe(2)   | 154.44(19) |
| C(2)-N(2)    | 1.522(6)  | B(4)#1-O(18)-P(2)    | 131.7(2)   |
| C(2)-H(2A)   | 0.97      | B(3)-O(19)-B(4)      | 125.4(3)   |
| C(2)-H(2B)   | 0.97      | B(3)-O(19)-Fe(2)     | 117.3(2)   |
| C(3)-N(2)    | 1.469(6)  | B(4)-O(19)-Fe(2)     | 117.3(2)   |
| C(3)-C(4)    | 1.501(6)  | P(2)#5-O(20)-Fe(2)   | 132.28(16) |
| C(3)-H(3A)   | 0.97      | B(1)-O(21)-P(4)      | 128.5(2)   |
| C(3)-H(3B)   | 0.97      | B(2)-O(22)-P(2)      | 131.5(2)   |
| C(4)-N(3)    | 1.487(6)  | P(7)-O(23)-Fe(2)     | 131.44(17) |
| C(4)-H(4A)   | 0.97      | P(3)-O(24)-Fe(1)     | 129.53(16) |
| C(4)-H(4B)   | 0.97      | P(2)-O(25)-Fe(1)     | 128.88(15) |
| C(5)-C(6)    | 1.508(14) | P(4)-O(26)-Fe(1)     | 124.79(16) |
| C(5)-N(4)    | 1.499(12) | P(3)-O(27)-Fe(2)     | 131.77(16) |
| C(5)-C(6')   | 1.548(17) | B(2)-O(28)-B(1)      | 125.2(3)   |

|                   |            |                    |           |
|-------------------|------------|--------------------|-----------|
| C(5')-N(4)#8      | 1.481(13)  | B(2)-O(28)-Fe(1)   | 115.7(2)  |
| C(6)-N(5)         | 1.496(13)  | B(1)-O(28)-Fe(1)   | 113.7(2)  |
| C(6')-N(5')       | 1.387(17)  | B(1)-O(29)-P(3)    | 129.1(2)  |
| N(1)-H(1C)        | 0.89       | B(2)-O(30)-P(1)    | 127.8(2)  |
| N(1)-H(1D)        | 0.89       | C(2)-C(1)-N(1)     | 115.0(5)  |
| N(1)-H(1E)        | 0.89       | C(2)-C(1)-H(1A)    | 108.5     |
| N(2)-H(2C)        | 0.9        | N(1)-C(1)-H(1A)    | 108.5     |
| N(2)-H(2D)        | 0.9        | C(2)-C(1)-H(1B)    | 108.5     |
| N(3)-H(3C)        | 0.89       | N(1)-C(1)-H(1B)    | 108.5     |
| N(3)-H(3D)        | 0.89       | H(1A)-C(1)-H(1B)   | 107.5     |
| N(3)-H(3E)        | 0.89       | C(1)-C(2)-N(2)     | 114.5(4)  |
| O(24)-Fe(1)-O(8)  | 91.38(10)  | C(1)-C(2)-H(2A)    | 108.6     |
| O(24)-Fe(1)-O(6)  | 90.08(11)  | N(2)-C(2)-H(2A)    | 108.6     |
| O(8)-Fe(1)-O(6)   | 93.96(11)  | C(1)-C(2)-H(2B)    | 108.6     |
| O(24)-Fe(1)-O(25) | 178.00(11) | N(2)-C(2)-H(2B)    | 108.6     |
| O(8)-Fe(1)-O(25)  | 89.67(10)  | H(2A)-C(2)-H(2B)   | 107.6     |
| O(6)-Fe(1)-O(25)  | 91.52(11)  | N(2)-C(3)-C(4)     | 113.5(4)  |
| O(24)-Fe(1)-O(26) | 88.85(11)  | N(2)-C(3)-H(3A)    | 108.9     |
| O(8)-Fe(1)-O(26)  | 90.72(11)  | C(4)-C(3)-H(3A)    | 108.9     |
| O(6)-Fe(1)-O(26)  | 175.23(10) | N(2)-C(3)-H(3B)    | 108.9     |
| O(25)-Fe(1)-O(26) | 89.45(11)  | C(4)-C(3)-H(3B)    | 108.9     |
| O(24)-Fe(1)-O(28) | 93.49(10)  | H(3A)-C(3)-H(3B)   | 107.7     |
| O(8)-Fe(1)-O(28)  | 173.15(10) | N(3)-C(4)-C(3)     | 110.4(4)  |
| O(6)-Fe(1)-O(28)  | 90.84(10)  | N(3)-C(4)-H(4A)    | 109.6     |
| O(25)-Fe(1)-O(28) | 85.32(9)   | C(3)-C(4)-H(4A)    | 109.6     |
| O(26)-Fe(1)-O(28) | 84.58(10)  | N(3)-C(4)-H(4B)    | 109.6     |
| O(27)-Fe(2)-O(17) | 92.60(11)  | C(3)-C(4)-H(4B)    | 109.6     |
| O(27)-Fe(2)-O(15) | 92.10(12)  | H(4A)-C(4)-H(4B)   | 108.1     |
| O(17)-Fe(2)-O(15) | 91.92(11)  | N(4)-C(5)-C(6)     | 110.8(8)  |
| O(27)-Fe(2)-O(20) | 177.65(11) | C(6')-C(5')-N(4)#8 | 105.4(9)  |
| O(17)-Fe(2)-O(20) | 86.86(11)  | N(5)-C(6)-C(5)     | 113.5(8)  |
| O(15)-Fe(2)-O(20) | 90.20(11)  | C(5')-C(6)-N(5')   | 118.1(11) |
| O(27)-Fe(2)-O(23) | 90.30(11)  | C(1)-N(1)-H(1C)    | 109.5     |
| O(17)-Fe(2)-O(23) | 98.47(11)  | C(1)-N(1)-H(1D)    | 109.5     |
| O(15)-Fe(2)-O(23) | 169.21(11) | H(1C)-N(1)-H(1D)   | 109.5     |
| O(20)-Fe(2)-O(23) | 87.52(11)  | C(1)-N(1)-H(1E)    | 109.5     |
| O(27)-Fe(2)-O(19) | 90.30(10)  | H(1C)-N(1)-H(1E)   | 109.5     |
| O(17)-Fe(2)-O(19) | 174.57(11) | H(1D)-N(1)-H(1E)   | 109.5     |
| O(15)-Fe(2)-O(19) | 83.37(10)  | C(3)-N(2)-C(2)     | 109.9(4)  |
| O(20)-Fe(2)-O(19) | 90.43(10)  | C(3)-N(2)-H(2C)    | 109.7     |
| O(23)-Fe(2)-O(19) | 86.11(10)  | C(2)-N(2)-H(2C)    | 109.7     |
| O(6)-P(1)-O(30)   | 112.61(15) | C(3)-N(2)-H(2D)    | 109.7     |

---

|                    |            |                   |          |
|--------------------|------------|-------------------|----------|
| O(6)-P(1)-O(14)    | 113.50(16) | C(2)-N(2)-H(2D)   | 109.7    |
| O(30)-P(1)-O(14)   | 107.93(15) | H(2C)-N(2)-H(2D)  | 108.2    |
| O(6)-P(1)-O(11)    | 113.21(15) | C(4)-N(3)-H(3C)   | 109.5    |
| O(30)-P(1)-O(11)   | 103.55(14) | C(4)-N(3)-H(3D)   | 109.5    |
| O(14)-P(1)-O(11)   | 105.28(14) | H(3C)-N(3)-H(3D)  | 109.5    |
| O(25)-P(2)-O(20)#1 | 114.06(15) | C(4)-N(3)-H(3E)   | 109.5    |
| O(25)-P(2)-O(22)   | 110.41(15) | H(3C)-N(3)-H(3E)  | 109.5    |
| O(20)#1-P(2)-O(22) | 107.63(15) | H(3D)-N(3)-H(3E)  | 109.5    |
| O(25)-P(2)-O(18)   | 108.51(15) | C(5)-N(4)-C(5)#8  | 141.7(8) |
| O(20)#1-P(2)-O(18) | 109.57(14) | C(5')#8-N(4)-C(5) | 115.9(6) |

"Symmetry transformations used to generate equivalent atoms: #1  $x-1, y-1, z$ ; #2  $x-1, y, z$ ; #3  $-x+2, -y+2, -z+1$ ; #4  $x, y+1, z$ ; #5  $x+1, y+1, z$ ; #6  $x, y-1, z$ ; #7  $x+1, y, z$ ; #8  $-x+1, -y+2, -z+1$

**Table S2 Hydrogen bonds for FeBPO-CJ28<sup>a</sup>**

| D-H...A               | d(D-H) (Å) | d(H...A) (Å) | d(D...A) (Å) | <(DHA) (°) |
|-----------------------|------------|--------------|--------------|------------|
| O(1)-H(1)...O(5)#9    | 0.82       | 2.03         | 2.804(4)     | 156.1      |
| O(5)-H(5)...O(1)#9    | 0.82       | 2.07         | 2.804(4)     | 149.1      |
| O(7)-H(7)...O(18)     | 0.82       | 2.06         | 2.729(4)     | 138.9      |
| N(1)-H(1C)...O(11)#10 | 0.89       | 2.08         | 2.929(5)     | 159.5      |
| N(1)-H(1D)...O(4)#10  | 0.89       | 1.91         | 2.779(6)     | 165.6      |
| N(1)-H(1E)...O(5)     | 0.89       | 2.26         | 3.127(6)     | 163.9      |
| N(2)-H(2C)...O(2)#10  | 0.9        | 1.79         | 2.667(5)     | 163.6      |
| N(2)-H(2D)...O(4)#10  | 0.9        | 1.9          | 2.790(5)     | 168.9      |
| N(3)-H(3C)...O(21)#6  | 0.89       | 2.08         | 2.809(4)     | 138.3      |
| N(3)-H(3D)...O(22)    | 0.89       | 2.08         | 2.931(4)     | 158.9      |
| N(3)-H(3E)...O(12)#6  | 0.89       | 2.1          | 2.940(4)     | 156.3      |
| N(3)-H(3E)...O(14)    | 0.89       | 2.32         | 3.041(4)     | 137.8      |

<sup>a</sup>Symmetry transformations used to generate equivalent atoms:

#1  $x-1, y-1, z$     #2  $x-1, y, z$     #3  $-x+2, -y+2, -z+1$   
 #4  $x, y+1, z$     #5  $x+1, y+1, z$     #6  $x, y-1, z$     #7  $x+1, y, z$   
 #8  $-x+1, -y+2, -z+1$     #9  $-x+2, -y+2, -z$     #10  $-x+2, -y+1, -z$

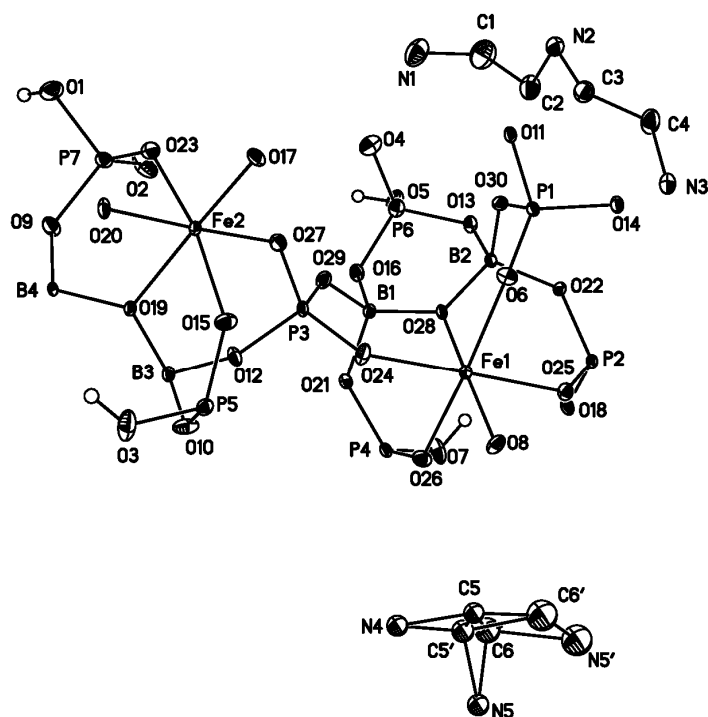

Figure S1 Thermal ellipsoid plots (30% probability) and atomic labeling schemes of the framework in FeBPO-CJ28.

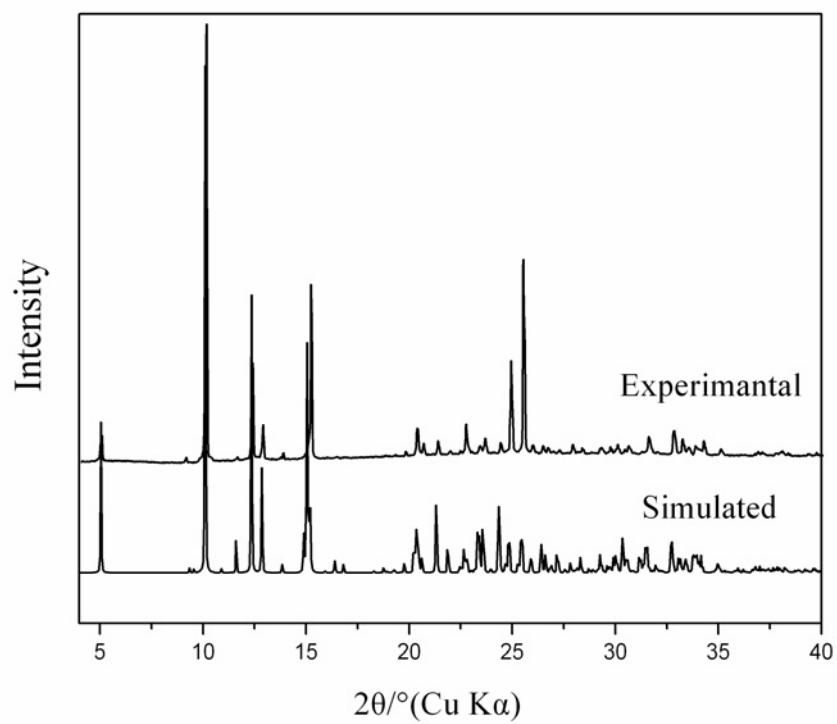

Figure S2 Simulated and experimental powder X-ray diffraction patterns of FeBPO-CJ28.



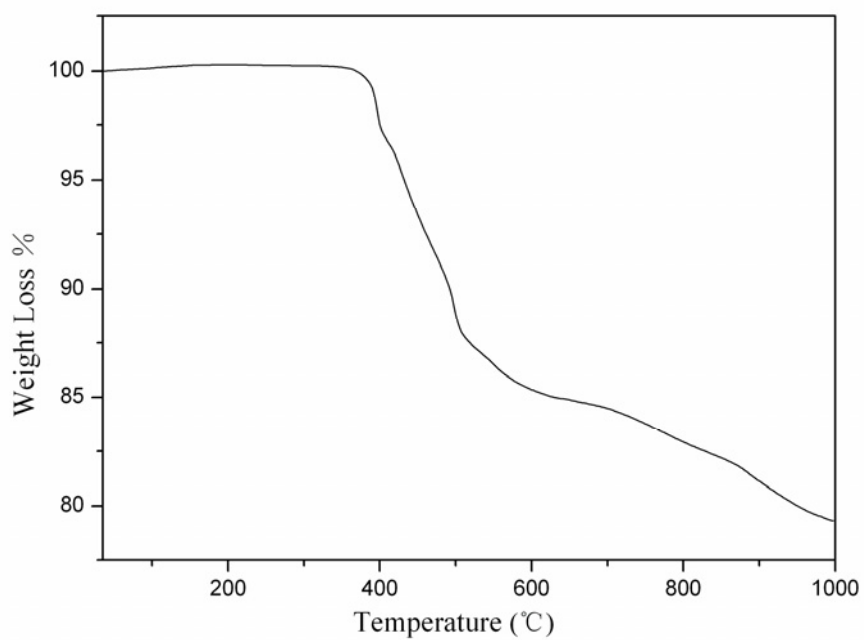

Figure S3 TG curve of FeBPO-CJ28. Restrained to the experimental condition, the temperature can only come to 1000 °C, and the total loss weight about 20.7% is a little smaller than the calculated value (22.2%).
